# Supplementary material
Source: publisher figshare collection journal article supplement (https://gsajournals.figshare.com/ndownloader/files/12725162)
Supplement: Supplementary file 1 [file 12725162]

## Sheet: Table S7-AsmRacon3Pilon3
Table S8: Assembly statistics and BUSCO scores for all genomes after polishing Racon 3 times followed by polishing with Pilon 3 times.
					Assembly Statistics						BUSCO Scores
Species	Assembly Name	Racon Runs	Pilon Runs		Assembly Size (bp)	Contigs	N50 (bp)	Contigs >100Kb	Contigs >1Mb		Complete (%)	Complete and Single Copy (%)	Complete and duplicated (%)	Fragmented (%)	Missing (%)	BUSCOs Tested
Dana	Dana.pass.miniasm.racon.x3.pilon.x1.fasta	3	1		189361753	371	2614302	147	44		97.8	96.4	1.4	0.3	1.9	978
Dana	Dana.pass.miniasm.racon.x3.pilon.x2.fasta	3	2		189251597	371	2612849	147	44		98.2	96.8	1.4	0.2	1.6	978
Dana	Dana.pass.miniasm.racon.x3.pilon.x3.fasta	3	3		189221946	371	2612784	147	44		98.2	96.8	1.4	0.2	1.6	978
Dbia	Dbia.pass.miniasm.racon.x3.pilon.x1.fasta	3	1		182528556	661	2791631	219	31		98.3	96.6	1.7	0.5	1.2	978
Dbia	Dbia.pass.miniasm.racon.x3.pilon.x2.fasta	3	2		182483007	661	2791142	219	31		98.7	96.9	1.8	0.1	1.2	978
Dbia	Dbia.pass.miniasm.racon.x3.pilon.x3.fasta	3	3		182453935	661	2791184	219	31		98.7	96.9	1.8	0.1	1.2	978
Dbip	Dbip.pass.miniasm.racon.x3.pilon.x1.fasta	3	1		163412075	570	567567	356	26		92.8	90.8	2	1.3	5.9	978
Dbip	Dbip.pass.miniasm.racon.x3.pilon.x2.fasta	3	2		163234481	570	567411	356	26		93.8	91.4	2.4	0.7	5.5	978
Dbip	Dbip.pass.miniasm.racon.x3.pilon.x3.fasta	3	3		163165444	570	567431	356	26		93.9	91.5	2.4	0.8	5.3	978
Dere	Dere.pass.miniasm.racon.x3.pilon.x1.fasta	3	1		130335203	58	16968048	29	21		98.4	96.7	1.7	0.2	1.4	978
Dere	Dere.pass.miniasm.racon.x3.pilon.x2.fasta	3	2		130309759	58	16963565	29	21		98.6	97.1	1.5	0.1	1.3	978
Dere	Dere.pass.miniasm.racon.x3.pilon.x3.fasta	3	3		130293209	58	16960765	29	21		98.6	97.1	1.5	0.1	1.3	978
Deug	Deug.pass.miniasm.racon.x3.pilon.x1.fasta	3	1		159682445	546	1011233	260	43		97.4	95.7	1.7	0.5	2.1	978
Deug	Deug.pass.miniasm.racon.x3.pilon.x2.fasta	3	2		159485810	546	1010825	260	43		97.9	96.1	1.8	0.2	1.9	978
Deug	Deug.pass.miniasm.racon.x3.pilon.x3.fasta	3	3		159429531	546	1010701	259	43		97.9	96.1	1.8	0.2	1.9	978
Dtriauraria	Dtriauraria.pass.miniasm.racon.x3.pilon.x1.fasta	3	1		173894927	482	744088	342	35		93.9	88.4	5.5	0.6	5.5	978
Dtriauraria	Dtriauraria.pass.miniasm.racon.x3.pilon.x2.fasta	3	2		173677417	482	741677	342	35		93.6	87.5	6.1	0.8	5.6	978
Dtriauraria	Dtriauraria.pass.miniasm.racon.x3.pilon.x3.fasta	3	3		173623250	482	741655	342	35		93.8	87.5	6.3	0.7	5.5	978
Dmau	Dmau.pass.miniasm.racon.x3.pilon.x1.fasta	3	1		134214723	266	4739375	65	28		98.6	96.9	1.7	0.1	1.3	978
Dmau	Dmau.pass.miniasm.racon.x3.pilon.x2.fasta	3	2		134174255	266	4738417	65	28		98.7	97	1.7	0.1	1.2	978
Dmau	Dmau.pass.miniasm.racon.x3.pilon.x3.fasta	3	3		134165749	266	4738483	65	28		98.7	97	1.7	0.1	1.2	978
Dmoj	Dmoj.pass.miniasm.racon.x3.pilon.x1.fasta	3	1		168205341	122	5221278	89	40		97.7	95	2.7	0.2	2.1	978
Dmoj	Dmoj.pass.miniasm.racon.x3.pilon.x2.fasta	3	2		168159509	122	5221004	89	40		98	95.4	2.6	0.1	1.9	978
Dmoj	Dmoj.pass.miniasm.racon.x3.pilon.x3.fasta	3	3		168142858	122	5220960	89	40		98	95.4	2.6	0.1	1.9	978
Dper	Dper.pass.miniasm.racon.x3.pilon.x1.fasta	3	1		164052471	415	3429236	143	34		96.8	94	2.8	0.7	2.5	978
Dper	Dper.pass.miniasm.racon.x3.pilon.x2.fasta	3	2		163957788	415	3429094	143	34		98	95.3	2.7	0.2	1.8	978
Dper	Dper.pass.miniasm.racon.x3.pilon.x3.fasta	3	3		163933157	415	3429058	143	34		98	95.3	2.7	0.2	1.8	978
Dpse	Dpse.pass.miniasm.racon.x3.pilon.x1.fasta	3	1		159085793	361	2983361	141	33		97.5	95.6	1.9	0.5	2	978
Dpse	Dpse.pass.miniasm.racon.x3.pilon.x2.fasta	3	2		159044975	361	2983169	141	33		98	95.8	2.2	0.1	1.9	978
Dpse	Dpse.pass.miniasm.racon.x3.pilon.x3.fasta	3	3		159031139	361	2983193	141	33		98	95.8	2.2	0.1	1.9	978
Dsec	Dsec.pass.miniasm.racon.x3.pilon.x1.fasta	3	1		138181178	109	7714085	59	23		98.5	96.8	1.7	0.2	1.3	978
Dsec	Dsec.pass.miniasm.racon.x3.pilon.x2.fasta	3	2		138128841	109	7712252	59	23		98.7	97	1.7	0.2	1.1	978
Dsec	Dsec.pass.miniasm.racon.x3.pilon.x3.fasta	3	3		138120607	109	7712364	59	23		98.7	97	1.7	0.2	1.1	978
Dsim	Dsim.pass.miniasm.racon.x3.pilon.x1.fasta	3	1		133809230	76	7763343	61	24		98.2	96.2	2	0.2	1.6	978
Dsim	Dsim.pass.miniasm.racon.x3.pilon.x2.fasta	3	2		133745214	76	7762333	61	24		98.5	96.4	2.1	0.1	1.4	978
Dsim	Dsim.pass.miniasm.racon.x3.pilon.x3.fasta	3	3		133725236	76	7762389	61	24		98.6	96.5	2.1	0.1	1.3	978
Dvir	Dvir.pass.miniasm.racon.x3.pilon.x1.fasta	3	1		169798436	141	4170927	83	40		97.4	95.5	1.9	0.4	2.2	978
Dvir	Dvir.pass.miniasm.racon.x3.pilon.x2.fasta	3	2		169744371	141	4170025	83	40		97.7	95.6	2.1	0.2	2.1	978
Dvir	Dvir.pass.miniasm.racon.x3.pilon.x3.fasta	3	3		169714588	141	4170062	83	40		97.7	95.7	2	0.2	2.1	978
Dwil	Dwil.pass.miniasm.racon.x3.pilon.x1.fasta	3	1		195198068	489	1518469	266	49		97.1	94.3	2.8	1.2	1.7	978
Dwil	Dwil.pass.miniasm.racon.x3.pilon.x2.fasta	3	2		195040579	489	1516375	266	49		98.1	94.9	3.2	0.2	1.7	978
Dwil	Dwil.pass.miniasm.racon.x3.pilon.x3.fasta	3	3		194955081	489	1515988	266	49		98.1	94.9	3.2	0.2	1.7	978
Dyak	Dyak.pass.miniasm.racon.x3.pilon.x1.fasta	3	1		143327013	111	5229310	68	34		98.1	96.6	1.5	0.4	1.5	978
Dyak	Dyak.pass.miniasm.racon.x3.pilon.x2.fasta	3	2		143261903	111	5228008	68	34		98.4	96.8	1.6	0.1	1.5	978
Dyak	Dyak.pass.miniasm.racon.x3.pilon.x3.fasta	3	3		143252825	111	5227393	68	34		98.4	96.8	1.6	0.1	1.5	978
